# Supplementary material for: Radiomic Consensus Clustering in Glioblastoma and Association with Gene Expression Profiles
Source: MDPI journal article supplement (doi:10.3390/cancers16244256), 2024-12-21
Supplement: s1 [file cancers-3352614-supplementary.pdf › cancers-3352614-supplementary.pdf]

### **Supplemental Materials**

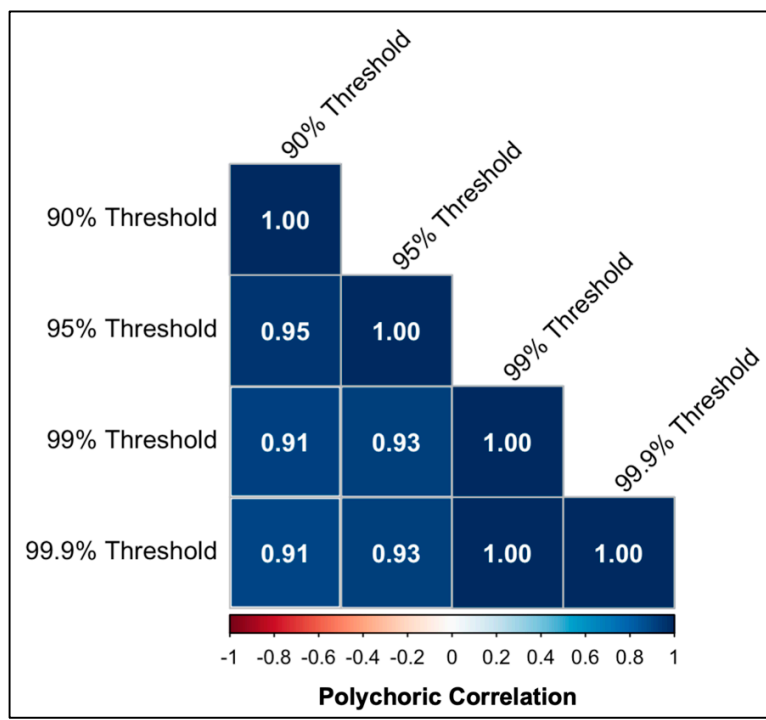

**Figure S1.** Polychoric correlation of cluster assignments across different absolute pairwise correlation cut-offs for radiomic feature selection process.

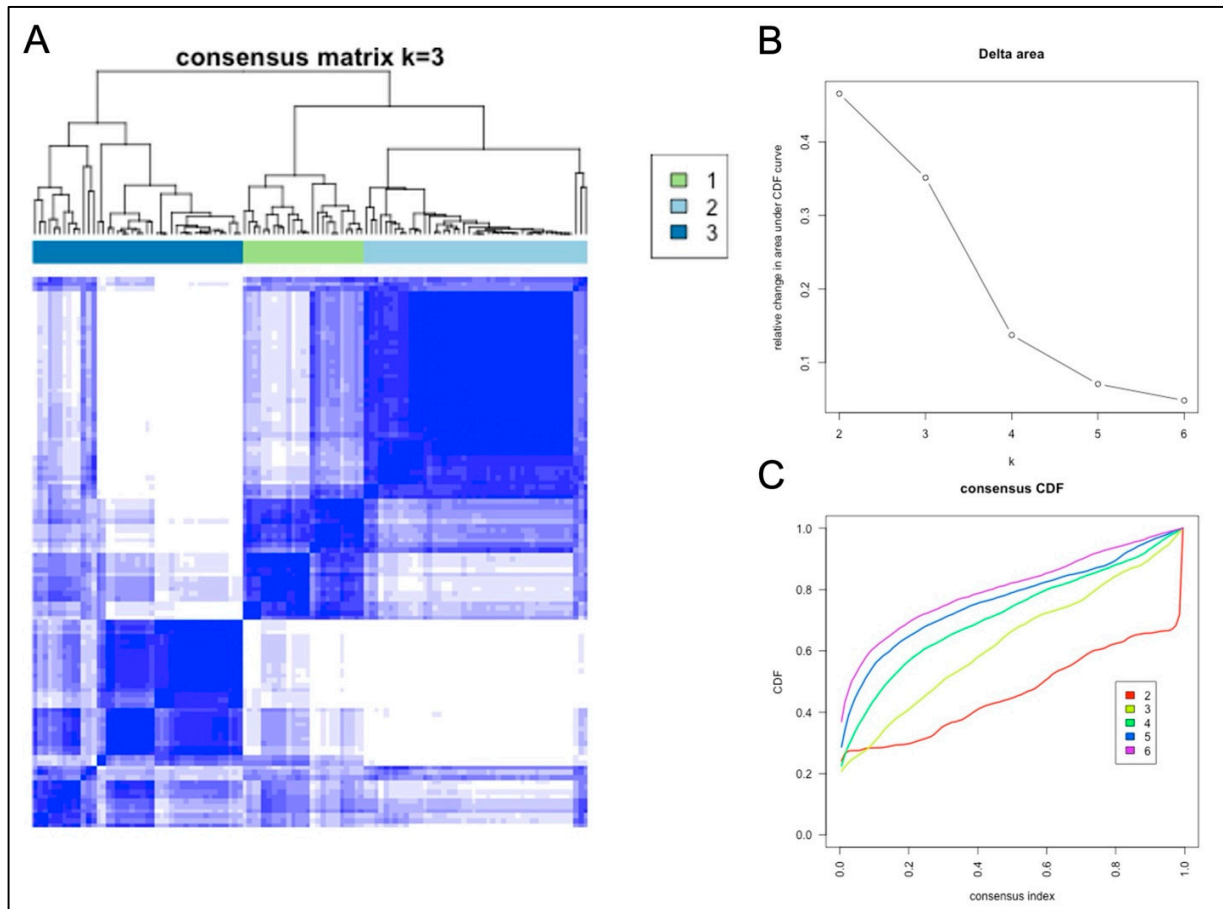

**Figure S2.** Unsupervised consensus clustering results using radiomic features from the GBM cohort. Includes (A) consensus cluster similarity matrix, (B) consensus CDF delta area plot, and (C) consensus CDF plot.

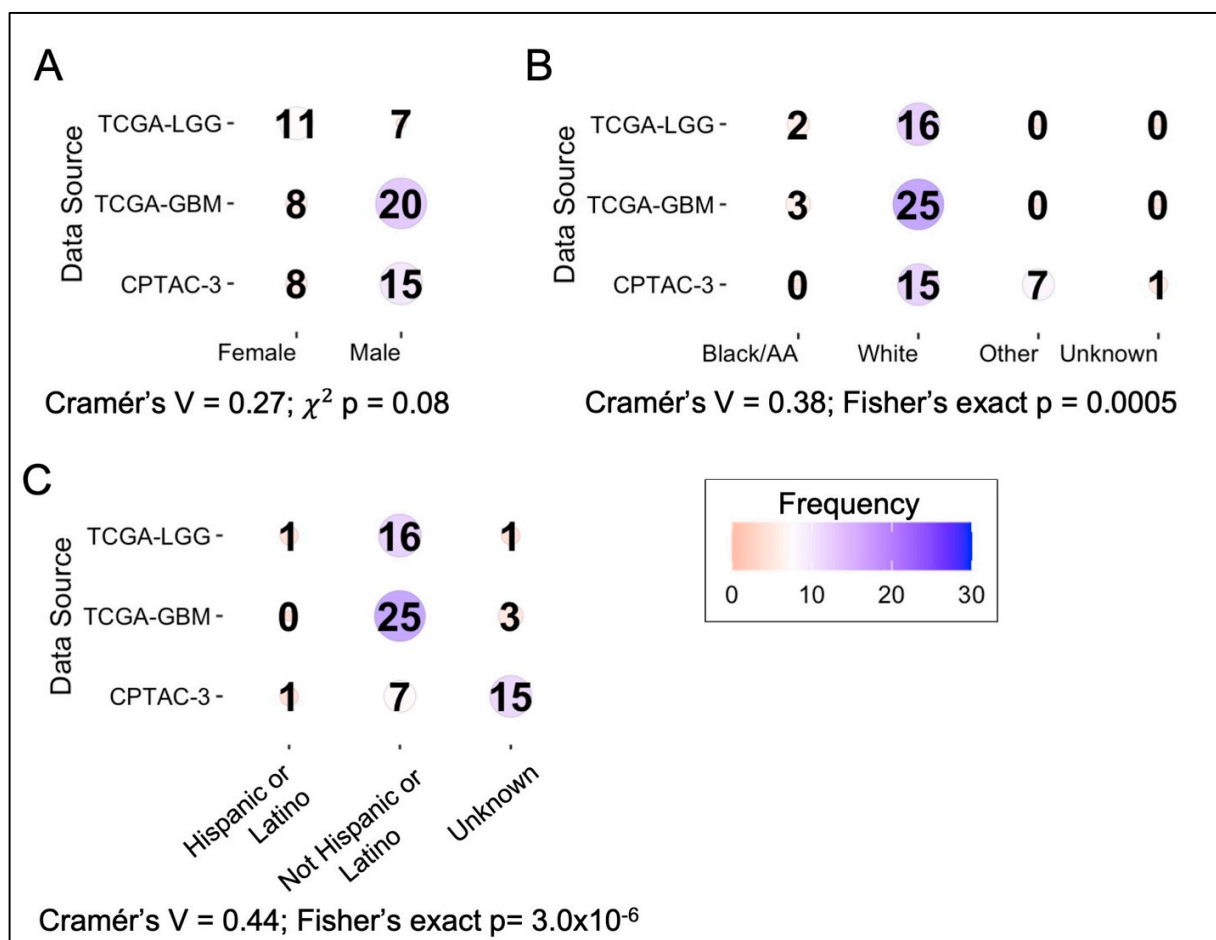

**Figure S3.** Correlation of demographic variables across data sets (i.e., TCGA-LGG, TCGA-GBM, or CPTAC-3-GBM) displayed as contingency tables. Categorical covariables include (A) patient sex, (B) race group, and (C) ethnicity. Correlation was determined with Cramér's V test and significant difference in counts across data sources was determined with  $\chi^2$ -test or Fisher's exact test, when appropriate.

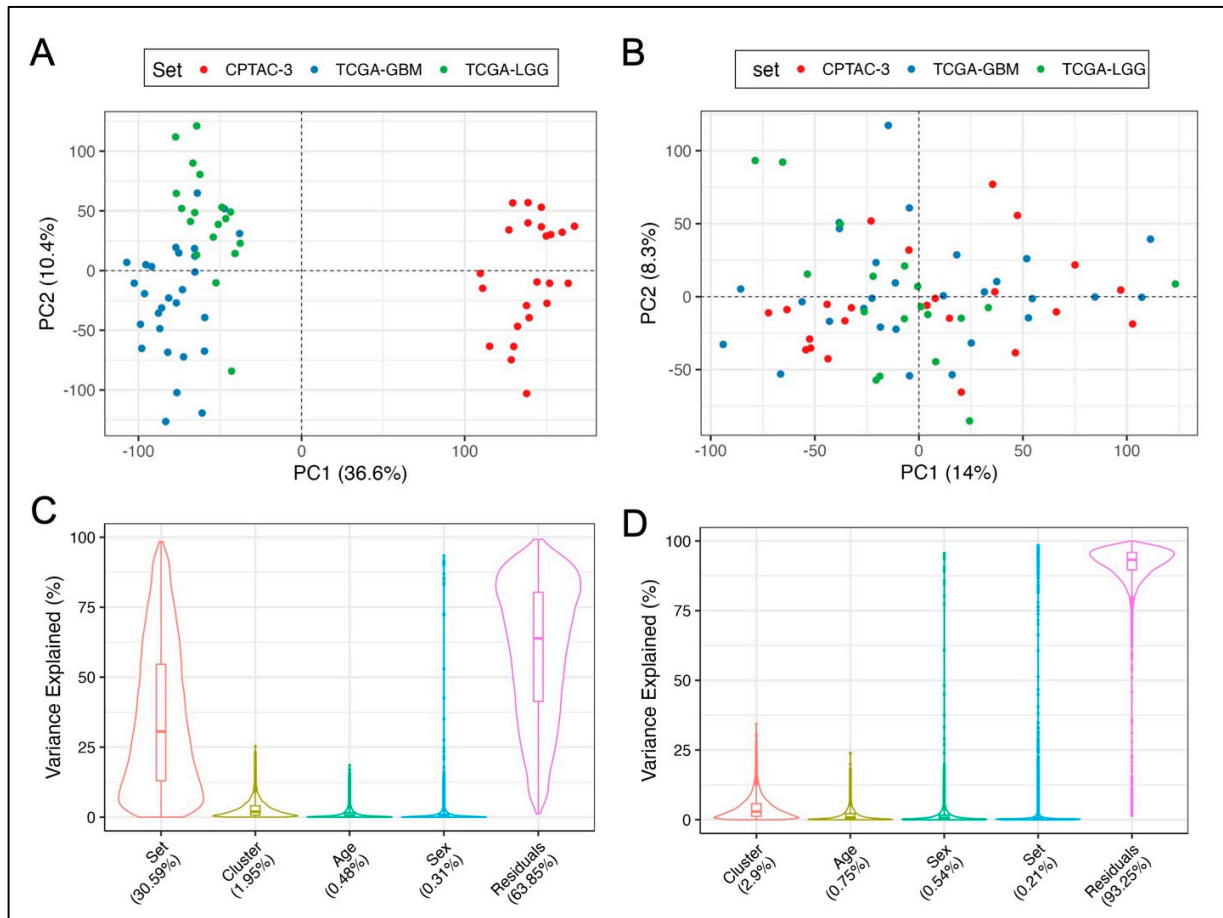

**Figure S4.** Principal components analyses (A-B) and explained variance plots (C-D) for gene expression data before and after batch effect adjustment using Combat-Seq, respectively. Set represents different data sources (i.e., TCGA-LGG, TCGA-GBM, or CPTAC-3-GBM).

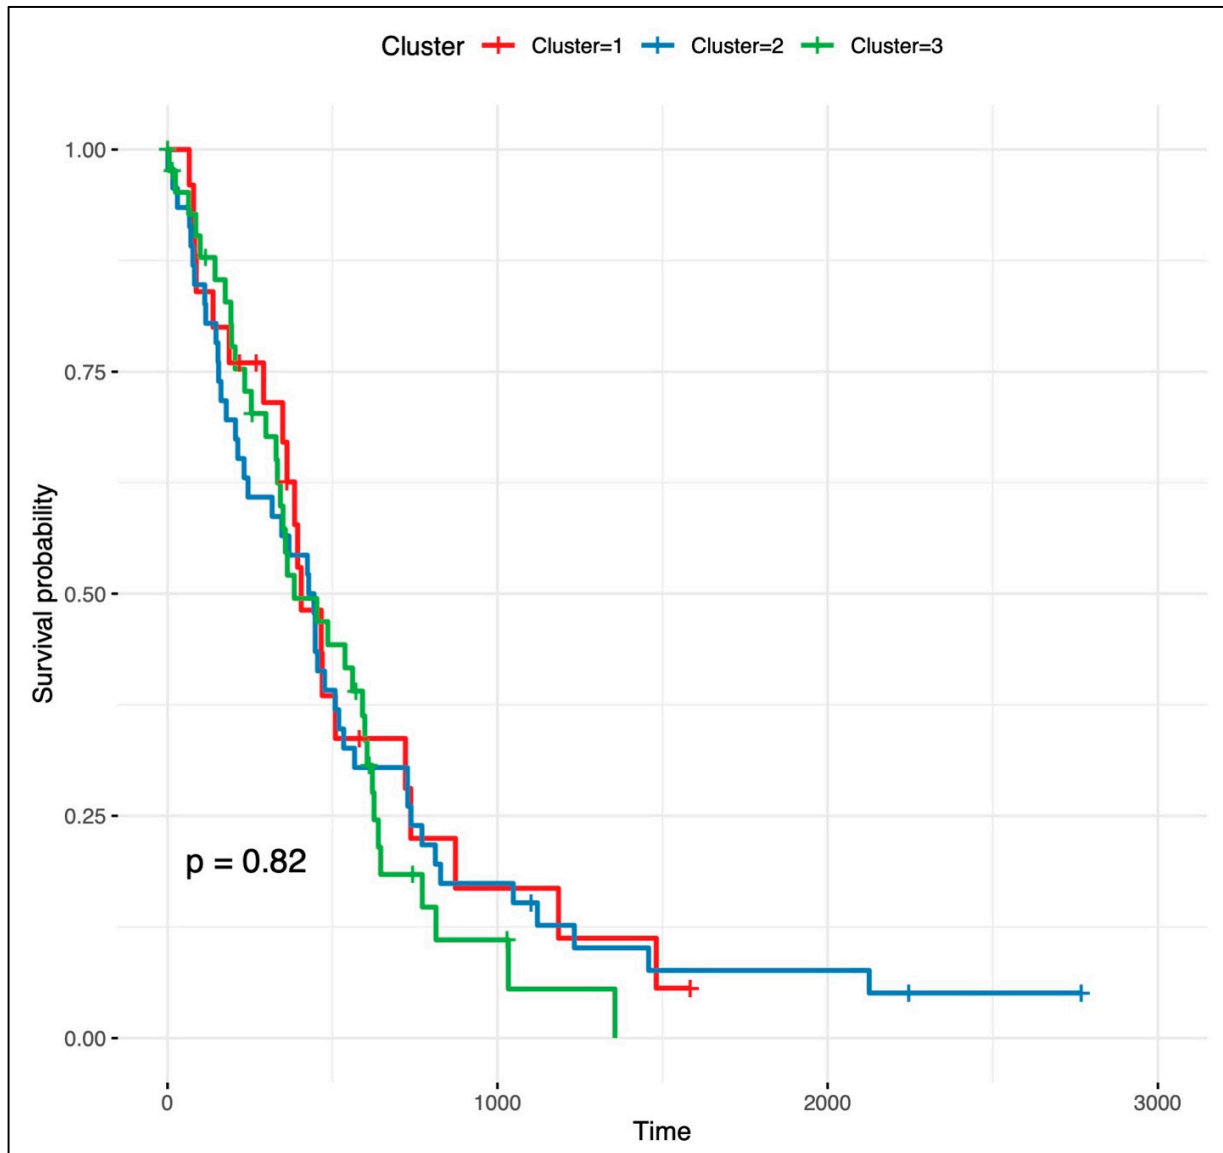

**Figure S5.** Overall survival probability curves stratified by radiomic clusters. Time represented in days. P value represents log-rank test.

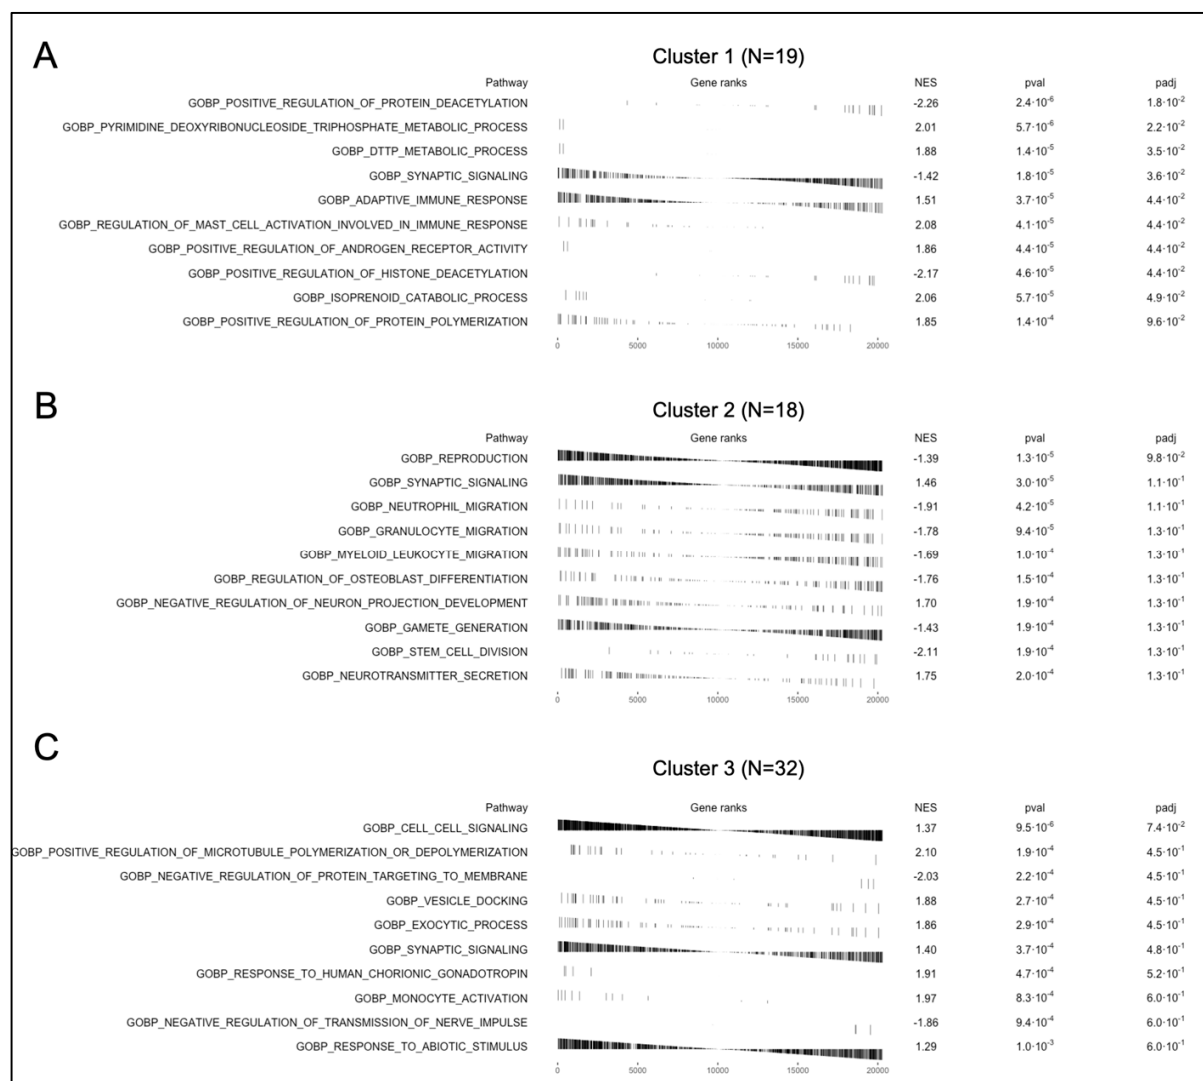

**Figure S6.** Top ten enriched pathways (sorted by p-adjusted value) from Gene Set Enrichment Analysis. Plot tables are separated for each cluster: (A) Cluster 1, (B) Cluster 2, and (C) Cluster 3.

**Table S1.** Summary of differentially expressed genes identified in two of the three clusters.

<sup>1</sup> log<sub>2</sub>FC = log<sub>2</sub> fold-change of gene expression; <sup>2</sup> Bolded lines represent genes significantly enriched in Cluster 1 after correction for multiple comparisons.

| Symbol                   | log <sub>2</sub> FC <sup>1</sup> |              | p              |                | p-adj.      |             |
|--------------------------|----------------------------------|--------------|----------------|----------------|-------------|-------------|
| Cluster                  | 1                                | 2            | 1              | 2              | 1           | 2           |
| <b>H3C8 <sup>2</sup></b> | <b>1.23</b>                      | <b>-0.92</b> | <b>6.5E-05</b> | <b>4.0E-03</b> | <b>0.04</b> | <b>0.78</b> |
| TMEM216                  | 0.67                             | -0.81        | 7.5E-04        | 4.3E-05        | 0.08        | 0.56        |
| CPNE8-AS1                | 1.00                             | -1.40        | 8.6E-03        | 1.9E-04        | 0.18        | 0.56        |
| SERINC5                  | -0.63                            | 0.70         | 4.3E-03        | 1.7E-03        | 0.14        | 0.78        |
| LINC00632                | -1.50                            | 1.56         | 2.6E-03        | 2.0E-03        | 0.12        | 0.78        |
| PNPLA4                   | 0.92                             | -0.87        | 1.4E-03        | 2.9E-03        | 0.10        | 0.78        |
| GPR179                   | -0.96                            | 0.89         | 2.6E-03        | 6.1E-03        | 0.12        | 0.78        |
| H4C11                    | 1.09                             | -0.83        | 2.6E-04        | 7.2E-03        | 0.06        | 0.78        |
| FBXW4P1                  | -0.73                            | 0.72         | 5.4E-03        | 7.2E-03        | 0.15        | 0.78        |
| APBA1                    | -0.56                            | 0.58         | 8.7E-03        | 7.5E-03        | 0.18        | 0.78        |
| RGS22                    | 1.16                             | -1.18        | 8.0E-03        | 7.6E-03        | 0.17        | 0.78        |
| COL6A6                   | -0.73                            | 0.71         | 5.7E-03        | 7.8E-03        | 0.15        | 0.78        |
| PMAIP1                   | 1.09                             | -0.90        | 9.4E-04        | 8.5E-03        | 0.09        | 0.78        |
| LINC02831                | 0.71                             | -0.71        | 8.0E-03        | 9.3E-03        | 0.17        | 0.78        |
| Cluster                  | 1                                | 3            | 1              | 3              | 1           | 3           |
| <b>PRX</b>               | <b>-0.85</b>                     | <b>0.60</b>  | <b>5.4E-05</b> | <b>2.0E-03</b> | <b>0.04</b> | <b>0.62</b> |
| <b>LOC124904616</b>      | <b>1.16</b>                      | <b>-0.76</b> | <b>3.6E-05</b> | <b>3.6E-03</b> | <b>0.03</b> | <b>0.62</b> |
| <b>NAT8L</b>             | <b>-1.11</b>                     | <b>0.69</b>  | <b>3.7E-05</b> | <b>6.1E-03</b> | <b>0.03</b> | <b>0.62</b> |
| LMF1                     | -0.55                            | 0.52         | 2.8E-04        | 1.2E-04        | 0.06        | 0.62        |
| H2AC21                   | 0.87                             | -0.89        | 2.3E-03        | 4.2E-04        | 0.11        | 0.62        |
| LOC124902388             | 0.83                             | -0.80        | 1.8E-03        | 7.3E-04        | 0.10        | 0.62        |
| RNY1                     | 1.23                             | -1.28        | 4.4E-03        | 9.0E-04        | 0.14        | 0.62        |
| APC2                     | -0.92                            | 0.70         | 2.5E-04        | 2.4E-03        | 0.06        | 0.62        |
| SUCNR1                   | 0.98                             | -0.82        | 1.2E-03        | 2.7E-03        | 0.09        | 0.62        |
| H2BC18                   | 0.62                             | -0.57        | 3.5E-03        | 3.0E-03        | 0.13        | 0.62        |
| RPS6P1                   | 0.71                             | -0.65        | 3.8E-03        | 3.4E-03        | 0.14        | 0.62        |
| H2AC13                   | 1.46                             | -1.07        | 2.5E-04        | 3.5E-03        | 0.06        | 0.62        |
| CYSLTR1                  | 0.79                             | -0.71        | 3.7E-03        | 3.6E-03        | 0.13        | 0.62        |
| MTATP8P2                 | -1.00                            | 0.93         | 4.9E-03        | 3.6E-03        | 0.15        | 0.62        |
| CTNND2                   | -0.78                            | 0.58         | 3.9E-04        | 4.1E-03        | 0.06        | 0.62        |
| CYP2A6                   | -0.92                            | 0.80         | 3.2E-03        | 5.0E-03        | 0.13        | 0.62        |
| TDRD12                   | -0.63                            | 0.56         | 6.4E-03        | 6.3E-03        | 0.16        | 0.62        |
| SLITRK5                  | -1.28                            | 0.97         | 1.1E-03        | 6.7E-03        | 0.09        | 0.62        |
| SLC52A3                  | -0.74                            | 0.66         | 6.3E-03        | 6.8E-03        | 0.16        | 0.62        |
| H2BC11                   | 0.85                             | -0.64        | 1.1E-03        | 6.9E-03        | 0.09        | 0.63        |
| RNF212                   | 1.24                             | -0.86        | 3.7E-04        | 7.1E-03        | 0.06        | 0.63        |
| PCDHGA4                  | -1.10                            | 0.81         | 9.6E-04        | 7.7E-03        | 0.09        | 0.65        |
| TTC36                    | -0.64                            | 0.53         | 4.3E-03        | 8.1E-03        | 0.14        | 0.66        |
| LOC124903420             | 1.17                             | -1.01        | 5.9E-03        | 8.2E-03        | 0.15        | 0.66        |
| Cluster                  | 2                                | 3            | 2              | 3              | 2           | 3           |
| SBF1P1                   | 0.86                             | -0.92        | 0.006          | 0.001          | 0.78        | 0.62        |
| RNU6-9                   | 0.60                             | -0.58        | 0.004          | 0.002          | 0.78        | 0.62        |
| SLC26A7                  | 1.18                             | -0.95        | 0.001          | 0.003          | 0.78        | 0.62        |
| OR10AD1                  | -0.62                            | 0.57         | 0.008          | 0.006          | 0.78        | 0.62        |
